# Supplementary material
Source: publisher figshare collection journal article supplement (https://acs.figshare.com/ndownloader/files/4593892)
Supplement: Supplementary file 1 [file 4593892]

data_bnsemos1

 

_audit_creation_method            SHELXL-97

_chemical_name_systematic

;

 ?

;

_chemical_name_common             ?

_chemical_melting_point           ?

_chemical_formula_moiety          ?

_chemical_formula_sum

 'C22 H30 Mo P2 Se2'

_chemical_formula_weight          610.26

 

loop_

 _atom_type_symbol

 _atom_type_description

 _atom_type_scat_dispersion_real

 _atom_type_scat_dispersion_imag

 _atom_type_scat_source

 'C'  'C'   0.0033   0.0016

 'International Tables Vol C Tables 4.2.6.8 and 6.1.1.4'

 'H'  'H'   0.0000   0.0000

 'International Tables Vol C Tables 4.2.6.8 and 6.1.1.4'

 'P'  'P'   0.1023   0.0942

 'International Tables Vol C Tables 4.2.6.8 and 6.1.1.4'

 'Se'  'Se'  -0.0929   2.2259

 'International Tables Vol C Tables 4.2.6.8 and 6.1.1.4'

 'Mo'  'Mo'  -1.6832   0.6857

 'International Tables Vol C Tables 4.2.6.8 and 6.1.1.4'

 

_symmetry_cell_setting            Triclinic

_symmetry_space_group_name_H-M    P-1

 

loop_

 _symmetry_equiv_pos_as_xyz

 'x, y, z'

 '-x, -y, -z'

 

_cell_length_a                    10.4797(4)

_cell_length_b                    10.8499(4)

_cell_length_c                    12.0185(4)

_cell_angle_alpha                 66.6940(10)

_cell_angle_beta                  78.1460(10)

_cell_angle_gamma                 69.7220(10)

_cell_volume                      1173.55(7)

_cell_formula_units_Z             2

_cell_measurement_temperature     125(2)

_cell_measurement_reflns_used     8582

_cell_measurement_theta_min       2.50

_cell_measurement_theta_max       32.36

 

_exptl_crystal_description        block

_exptl_crystal_colour             brown

_exptl_crystal_size_max           0.12

_exptl_crystal_size_mid           0.12

_exptl_crystal_size_min           0.10

_exptl_crystal_density_meas       ?

_exptl_crystal_density_diffrn     1.727

_exptl_crystal_density_method     'not measured'

_exptl_crystal_F_000              604

_exptl_absorpt_coefficient_mu     3.802

_exptl_absorpt_correction_type    empirical

_exptl_absorpt_correction_T_min   0.6583

_exptl_absorpt_correction_T_max   0.7023

_exptl_absorpt_process_details    sadabs

 

_exptl_special_details

;

 ?

;

 

_diffrn_ambient_temperature       125(2)

_diffrn_radiation_wavelength      0.71073

_diffrn_radiation_type            MoK\a

_diffrn_radiation_source          'fine-focus sealed tube'

_diffrn_radiation_monochromator   graphite

_diffrn_measurement_device_type   'CCD area detector'

_diffrn_measurement_method        'phi and omega scans'

_diffrn_detector_area_resol_mean  ?

_diffrn_standards_number          ?

_diffrn_standards_interval_count  ?

_diffrn_standards_interval_time   ?

_diffrn_standards_decay_%         ?

_diffrn_reflns_number             18978

_diffrn_reflns_av_R_equivalents   0.0225

_diffrn_reflns_av_sigmaI/netI     0.0276

_diffrn_reflns_limit_h_min        -14

_diffrn_reflns_limit_h_max        14

_diffrn_reflns_limit_k_min        -15

_diffrn_reflns_limit_k_max        15

_diffrn_reflns_limit_l_min        -17

_diffrn_reflns_limit_l_max        17

_diffrn_reflns_theta_min          1.85

_diffrn_reflns_theta_max          30.51

_reflns_number_total              7118

_reflns_number_gt                 6079

_reflns_threshold_expression      >2sigma(I)

 

_computing_data_collection        'Bruker SMART'

_computing_cell_refinement        'Bruker SMART'

_computing_data_reduction         'Bruker SAINT'

_computing_structure_solution     'SHELXS-97 (Sheldrick, 1990)'

_computing_structure_refinement   'SHELXL-97 (Sheldrick, 1997)'

_computing_molecular_graphics     'Bruker SHELXTL'

_computing_publication_material   'Bruker SHELXTL'

 

_refine_special_details

;

 Refinement of F^2^ against ALL reflections.  The weighted R-factor wR and

 goodness of fit S are based on F^2^, conventional R-factors R are based

 on F, with F set to zero for negative F^2^. The threshold expression of

 F^2^ > 2sigma(F^2^) is used only for calculating R-factors(gt) etc. and is

 not relevant to the choice of reflections for refinement.  R-factors based

 on F^2^ are statistically about twice as large as those based on F, and R-

 factors based on ALL data will be even larger.

;

 

_refine_ls_structure_factor_coef  Fsqd

_refine_ls_matrix_type            full

_refine_ls_weighting_scheme       calc

_refine_ls_weighting_details

 'calc w=1/[\s^2^(Fo^2^)+(0.0294P)^2^+0.1534P] where P=(Fo^2^+2Fc^2^)/3'

_atom_sites_solution_primary      direct

_atom_sites_solution_secondary    difmap

_atom_sites_solution_hydrogens    geom

_refine_ls_hydrogen_treatment     mixed

_refine_ls_extinction_method      none

_refine_ls_extinction_coef        ?

_refine_ls_number_reflns          7118

_refine_ls_number_parameters      262

_refine_ls_number_restraints      6

_refine_ls_R_factor_all           0.0314

_refine_ls_R_factor_gt            0.0227

_refine_ls_wR_factor_ref          0.0559

_refine_ls_wR_factor_gt           0.0529

_refine_ls_goodness_of_fit_ref    1.010

_refine_ls_restrained_S_all       1.009

_refine_ls_shift/su_max           0.001

_refine_ls_shift/su_mean          0.000

 

loop_

 _atom_site_label

 _atom_site_type_symbol

 _atom_site_fract_x

 _atom_site_fract_y

 _atom_site_fract_z

 _atom_site_U_iso_or_equiv

 _atom_site_adp_type

 _atom_site_occupancy

 _atom_site_symmetry_multiplicity

 _atom_site_calc_flag

 _atom_site_refinement_flags

 _atom_site_disorder_assembly

 _atom_site_disorder_group

Mo Mo 0.364593(14) 0.263523(14) 0.240388(13) 0.01396(4) Uani 1 1 d . . .

Se1 Se 0.464157(17) -0.003388(18) 0.306124(16) 0.01773(4) Uani 1 1 d . . .

P1 P 0.31428(5) 0.25052(5) 0.04777(4) 0.01931(9) Uani 1 1 d . . .

Se2 Se 0.240274(18) 0.525100(18) 0.154803(16) 0.02005(5) Uani 1 1 d . . .

P2 P 0.14320(4) 0.23141(5) 0.36186(4) 0.01703(9) Uani 1 1 d . . .

C1 C 0.59602(18) 0.25279(19) 0.14782(16) 0.0193(3) Uani 1 1 d D . .

H1 H 0.612(2) 0.307(2) 0.0681(14) 0.023 Uiso 1 1 d D . .

C2 C 0.55083(17) 0.32465(19) 0.23009(17) 0.0194(3) Uani 1 1 d D . .

H2 H 0.524(2) 0.4225(16) 0.1990(18) 0.023 Uiso 1 1 d D . .

C3 C 0.51099(18) 0.25661(19) 0.35470(17) 0.0187(3) Uani 1 1 d D . .

H3 H 0.5559(19) 0.1614(16) 0.3900(18) 0.022 Uiso 1 1 d D . .

C4 C 0.38432(18) 0.31966(19) 0.40791(16) 0.0187(3) Uani 1 1 d D . .

H4 H 0.361(2) 0.265(2) 0.4865(15) 0.022 Uiso 1 1 d D . .

C11 C 0.64918(17) -0.01576(18) 0.24276(15) 0.0171(3) Uani 1 1 d . . .

C12 C 0.68846(17) 0.10663(18) 0.17513(15) 0.0174(3) Uani 1 1 d . . .

C13 C 0.82483(18) 0.0907(2) 0.12804(17) 0.0221(4) Uani 1 1 d . . .

H13A H 0.8523 0.1721 0.0795 0.026 Uiso 1 1 calc R . .

C14 C 0.92054(19) -0.0402(2) 0.15036(17) 0.0254(4) Uani 1 1 d . . .

H14A H 1.0127 -0.0479 0.1189 0.030 Uiso 1 1 calc R . .

C15 C 0.88116(19) -0.1603(2) 0.21889(17) 0.0237(4) Uani 1 1 d . . .

H15A H 0.9464 -0.2505 0.2351 0.028 Uiso 1 1 calc R . .

C16 C 0.74604(18) -0.14781(19) 0.26351(16) 0.0200(3) Uani 1 1 d . . .

H16A H 0.7188 -0.2301 0.3088 0.024 Uiso 1 1 calc R . .

C21 C 0.27535(18) 0.57584(19) 0.27844(17) 0.0205(4) Uani 1 1 d . . .

C22 C 0.33144(17) 0.47358(19) 0.38523(17) 0.0193(3) Uani 1 1 d . . .

C23 C 0.34271(19) 0.5177(2) 0.47698(19) 0.0242(4) Uani 1 1 d . . .

H23A H 0.3767 0.4492 0.5515 0.029 Uiso 1 1 calc R . .

C24 C 0.30515(19) 0.6594(2) 0.4613(2) 0.0300(5) Uani 1 1 d . . .

H24A H 0.3136 0.6875 0.5243 0.036 Uiso 1 1 calc R . .

C25 C 0.2553(2) 0.7592(2) 0.3526(2) 0.0308(5) Uani 1 1 d . . .

H25A H 0.2313 0.8562 0.3403 0.037 Uiso 1 1 calc R . .

C26 C 0.24033(19) 0.7182(2) 0.26204(19) 0.0253(4) Uani 1 1 d . . .

H26A H 0.2059 0.7874 0.1879 0.030 Uiso 1 1 calc R . .

C31 C 0.4653(2) 0.2095(2) -0.05240(18) 0.0297(4) Uani 1 1 d . . .

H31A H 0.4401 0.1948 -0.1193 0.044 Uiso 1 1 calc R . .

H31B H 0.5324 0.1241 -0.0065 0.044 Uiso 1 1 calc R . .

H31C H 0.5050 0.2877 -0.0854 0.044 Uiso 1 1 calc R . .

C32 C 0.2357(2) 0.1174(2) 0.06476(19) 0.0305(4) Uani 1 1 d . . .

H32A H 0.2446 0.1056 -0.0135 0.046 Uiso 1 1 calc R . .

H32B H 0.1389 0.1470 0.0918 0.046 Uiso 1 1 calc R . .

H32C H 0.2815 0.0280 0.1251 0.046 Uiso 1 1 calc R . .

C33 C 0.2052(2) 0.4070(2) -0.0578(2) 0.0354(5) Uani 1 1 d . . .

H33A H 0.2438 0.4853 -0.0825 0.053 Uiso 1 1 calc R . .

H33B H 0.1135 0.4317 -0.0177 0.053 Uiso 1 1 calc R . .

H33C H 0.2000 0.3880 -0.1296 0.053 Uiso 1 1 calc R . .

C41 C 0.0518(2) 0.3647(2) 0.42992(19) 0.0271(4) Uani 1 1 d . . .

H41A H 0.0252 0.4569 0.3656 0.041 Uiso 1 1 calc R . .

H41B H 0.1112 0.3663 0.4823 0.041 Uiso 1 1 calc R . .

H41C H -0.0300 0.3424 0.4785 0.041 Uiso 1 1 calc R . .

C42 C 0.0045(2) 0.2299(2) 0.29212(19) 0.0309(5) Uani 1 1 d . . .

H42A H -0.0767 0.2301 0.3496 0.046 Uiso 1 1 calc R . .

H42B H 0.0323 0.1453 0.2710 0.046 Uiso 1 1 calc R . .

H42C H -0.0164 0.3134 0.2184 0.046 Uiso 1 1 calc R . .

C43 C 0.1610(2) 0.07102(19) 0.49549(17) 0.0237(4) Uani 1 1 d . . .

H43A H 0.0718 0.0716 0.5408 0.036 Uiso 1 1 calc R . .

H43B H 0.2247 0.0661 0.5476 0.036 Uiso 1 1 calc R . .

H43C H 0.1960 -0.0107 0.4698 0.036 Uiso 1 1 calc R . .

 

loop_

 _atom_site_aniso_label

 _atom_site_aniso_U_11

 _atom_site_aniso_U_22

 _atom_site_aniso_U_33

 _atom_site_aniso_U_23

 _atom_site_aniso_U_13

 _atom_site_aniso_U_12

Mo 0.01331(7) 0.01334(7) 0.01398(7) -0.00401(5) -0.00010(5) -0.00397(5)

Se1 0.01629(8) 0.01456(8) 0.02055(9) -0.00503(7) 0.00061(6) -0.00498(6)

P1 0.0189(2) 0.0216(2) 0.0162(2) -0.00708(18) -0.00172(17) -0.00391(18)

Se2 0.02081(9) 0.01477(8) 0.01974(9) -0.00250(7) -0.00244(7) -0.00324(7)

P2 0.0154(2) 0.0175(2) 0.0181(2) -0.00631(17) 0.00101(16) -0.00588(17)

C1 0.0161(8) 0.0181(8) 0.0185(8) -0.0023(7) 0.0006(7) -0.0049(7)

C2 0.0151(8) 0.0180(8) 0.0253(9) -0.0069(7) -0.0020(7) -0.0060(7)

C3 0.0176(8) 0.0167(8) 0.0231(9) -0.0076(7) -0.0046(7) -0.0044(7)

C4 0.0207(8) 0.0187(8) 0.0169(8) -0.0064(7) -0.0010(7) -0.0063(7)

C11 0.0169(8) 0.0204(8) 0.0140(8) -0.0082(7) -0.0003(6) -0.0036(7)

C12 0.0160(8) 0.0207(8) 0.0149(8) -0.0059(7) -0.0006(6) -0.0053(7)

C13 0.0173(8) 0.0268(10) 0.0190(8) -0.0049(7) 0.0002(7) -0.0075(7)

C14 0.0171(8) 0.0324(11) 0.0228(9) -0.0093(8) -0.0004(7) -0.0038(8)

C15 0.0200(9) 0.0236(9) 0.0215(9) -0.0091(7) -0.0037(7) 0.0031(7)

C16 0.0233(9) 0.0187(8) 0.0160(8) -0.0065(7) -0.0027(7) -0.0025(7)

C21 0.0156(8) 0.0179(8) 0.0288(10) -0.0094(7) 0.0014(7) -0.0061(7)

C22 0.0140(8) 0.0202(9) 0.0260(9) -0.0112(7) 0.0019(7) -0.0062(7)

C23 0.0179(8) 0.0279(10) 0.0321(10) -0.0165(8) 0.0000(7) -0.0073(7)

C24 0.0199(9) 0.0355(11) 0.0474(13) -0.0283(10) 0.0031(9) -0.0106(8)

C25 0.0208(9) 0.0232(10) 0.0536(14) -0.0211(10) 0.0040(9) -0.0078(8)

C26 0.0190(9) 0.0173(9) 0.0372(11) -0.0080(8) 0.0021(8) -0.0067(7)

C31 0.0274(10) 0.0422(12) 0.0226(10) -0.0179(9) 0.0034(8) -0.0097(9)

C32 0.0367(11) 0.0385(12) 0.0270(10) -0.0165(9) -0.0016(9) -0.0184(10)

C33 0.0370(12) 0.0338(12) 0.0288(11) -0.0101(9) -0.0134(9) 0.0022(10)

C41 0.0231(9) 0.0234(10) 0.0351(11) -0.0155(9) 0.0106(8) -0.0085(8)

C42 0.0202(9) 0.0461(13) 0.0266(10) -0.0109(9) -0.0025(8) -0.0119(9)

C43 0.0290(10) 0.0203(9) 0.0195(9) -0.0049(7) 0.0026(7) -0.0097(8)

 

_geom_special_details

;

 All esds (except the esd in the dihedral angle between two l.s. planes)

 are estimated using the full covariance matrix.  The cell esds are taken

 into account individually in the estimation of esds in distances, angles

 and torsion angles; correlations between esds in cell parameters are only

 used when they are defined by crystal symmetry.  An approximate (isotropic)

 treatment of cell esds is used for estimating esds involving l.s. planes.

;

 

loop_

 _geom_bond_atom_site_label_1

 _geom_bond_atom_site_label_2

 _geom_bond_distance

 _geom_bond_site_symmetry_2

 _geom_bond_publ_flag

Mo C3 2.2252(17) . ?

Mo C2 2.2354(17) . ?

Mo C4 2.3867(17) . ?

Mo C1 2.4355(17) . ?

Mo P2 2.5302(5) . ?

Mo P1 2.5433(5) . ?

Mo Se2 2.5471(2) . ?

Mo Se1 2.5560(2) . ?

Se1 C11 1.9109(17) . ?

P1 C31 1.818(2) . ?

P1 C32 1.825(2) . ?

P1 C33 1.829(2) . ?

Se2 C21 1.9127(19) . ?

P2 C43 1.8246(19) . ?

P2 C41 1.8254(19) . ?

P2 C42 1.8287(19) . ?

C1 H1 0.920(15) . ?

C1 C2 1.404(3) . ?

C1 C12 1.488(2) . ?

C2 H2 0.932(15) . ?

C2 C3 1.430(3) . ?

C3 H3 0.931(15) . ?

C3 C4 1.417(2) . ?

C4 H4 0.929(15) . ?

C4 C22 1.494(2) . ?

C11 C16 1.399(2) . ?

C11 C12 1.407(2) . ?

C12 C13 1.402(2) . ?

C13 C14 1.385(3) . ?

C14 C15 1.390(3) . ?

C15 C16 1.387(3) . ?

C21 C22 1.398(3) . ?

C21 C26 1.399(2) . ?

C22 C23 1.403(3) . ?

C23 C24 1.392(3) . ?

C24 C25 1.386(3) . ?

C25 C26 1.381(3) . ?

 

loop_

 _geom_angle_atom_site_label_1

 _geom_angle_atom_site_label_2

 _geom_angle_atom_site_label_3

 _geom_angle

 _geom_angle_site_symmetry_1

 _geom_angle_site_symmetry_3

 _geom_angle_publ_flag

C3 Mo C2 37.39(7) . . ?

C3 Mo C4 35.56(6) . . ?

C2 Mo C4 64.25(6) . . ?

C3 Mo C1 63.95(6) . . ?

C2 Mo C1 34.65(6) . . ?

C4 Mo C1 97.02(6) . . ?

C3 Mo P2 111.68(5) . . ?

C2 Mo P2 145.55(5) . . ?

C4 Mo P2 81.34(4) . . ?

C1 Mo P2 169.87(4) . . ?

C3 Mo P1 150.52(5) . . ?

C2 Mo P1 116.85(5) . . ?

C4 Mo P1 169.27(4) . . ?

C1 Mo P1 86.74(4) . . ?

P2 Mo P1 96.669(16) . . ?

C3 Mo Se2 102.23(5) . . ?

C2 Mo Se2 86.99(5) . . ?

C4 Mo Se2 82.94(4) . . ?

C1 Mo Se2 102.33(4) . . ?

P2 Mo Se2 87.438(12) . . ?

P1 Mo Se2 86.443(12) . . ?

C3 Mo Se1 87.15(5) . . ?

C2 Mo Se1 100.71(5) . . ?

C4 Mo Se1 105.17(4) . . ?

C1 Mo Se1 81.63(4) . . ?

P2 Mo Se1 89.123(12) . . ?

P1 Mo Se1 85.287(12) . . ?

Se2 Mo Se1 170.616(8) . . ?

C11 Se1 Mo 99.40(5) . . ?

C31 P1 C32 101.31(10) . . ?

C31 P1 C33 101.18(10) . . ?

C32 P1 C33 101.32(10) . . ?

C31 P1 Mo 113.86(7) . . ?

C32 P1 Mo 117.61(7) . . ?

C33 P1 Mo 118.81(7) . . ?

C21 Se2 Mo 97.52(6) . . ?

C43 P2 C41 101.07(9) . . ?

C43 P2 C42 101.36(10) . . ?

C41 P2 C42 100.44(10) . . ?

C43 P2 Mo 115.11(7) . . ?

C41 P2 Mo 114.44(6) . . ?

C42 P2 Mo 121.43(7) . . ?

H1 C1 C2 115.7(13) . . ?

H1 C1 C12 110.6(13) . . ?

C2 C1 C12 125.15(16) . . ?

H1 C1 Mo 120.9(13) . . ?

C2 C1 Mo 64.86(9) . . ?

C12 C1 Mo 113.10(11) . . ?

H2 C2 C1 118.3(13) . . ?

H2 C2 C3 117.9(13) . . ?

C1 C2 C3 121.67(16) . . ?

H2 C2 Mo 105.6(13) . . ?

C1 C2 Mo 80.49(10) . . ?

C3 C2 Mo 70.92(10) . . ?

H3 C3 C4 120.7(13) . . ?

H3 C3 C2 116.9(13) . . ?

C4 C3 C2 119.68(16) . . ?

H3 C3 Mo 104.3(13) . . ?

C4 C3 Mo 78.45(10) . . ?

C2 C3 Mo 71.69(10) . . ?

H4 C4 C3 114.7(13) . . ?

H4 C4 C22 113.1(13) . . ?

C3 C4 C22 123.06(16) . . ?

H4 C4 Mo 119.6(13) . . ?

C3 C4 Mo 65.99(10) . . ?

C22 C4 Mo 112.78(12) . . ?

C16 C11 C12 119.88(16) . . ?

C16 C11 Se1 119.57(13) . . ?

C12 C11 Se1 120.55(13) . . ?

C13 C12 C11 117.92(16) . . ?

C13 C12 C1 116.92(16) . . ?

C11 C12 C1 125.15(15) . . ?

C14 C13 C12 121.85(17) . . ?

C13 C14 C15 119.74(17) . . ?

C16 C15 C14 119.60(17) . . ?

C15 C16 C11 120.96(17) . . ?

C22 C21 C26 119.96(17) . . ?

C22 C21 Se2 121.24(13) . . ?

C26 C21 Se2 118.78(15) . . ?

C21 C22 C23 118.27(17) . . ?

C21 C22 C4 124.62(16) . . ?

C23 C22 C4 117.09(17) . . ?

C24 C23 C22 121.50(19) . . ?

C25 C24 C23 119.19(19) . . ?

C26 C25 C24 120.34(19) . . ?

C25 C26 C21 120.63(19) . . ?

 

_diffrn_measured_fraction_theta_max    0.994

_diffrn_reflns_theta_full              30.51

_diffrn_measured_fraction_theta_full   0.994

_refine_diff_density_max    0.796

_refine_diff_density_min   -0.284

_refine_diff_density_rms    0.083
